# Supplementary material for: Metformin induces CD11b+-cell-mediated growth inhibition of an osteosarcoma: implications for metabolic reprogramming of myeloid cells and anti-tumor effects
Source: PubMed Central journal article supplement — Int Immunol. 2018 Dec 15;31(4):187–98. doi: 10.1093/intimm/dxy079 (PMC6440441; doi:10.1093/intimm/dxy079), 2018-12-15

# Supplementary Figure 1

% of NK cells in tumor(/CD45.2<sup>+</sup> cells)

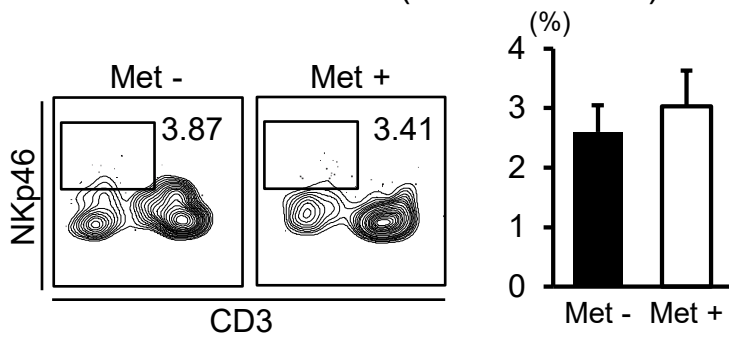

## Supplementary Figure 2

Gated on CD11b<sup>+</sup>Gr1<sup>hi</sup> cells

Spleen

Tumor

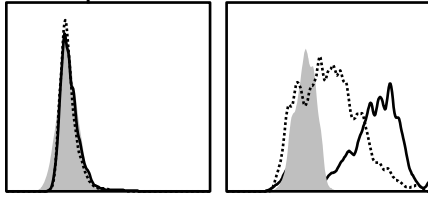

I-A/I-E on CD11b<sup>+</sup>Gr1<sup>hi</sup>

..... Met - — Met + ■ Isotype

# Supplementary Figure 3

Sorted tumor infiltrating CD11b<sup>+</sup> cells

Gated on lymphocytes

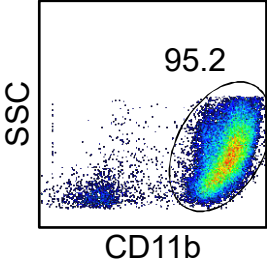

# Supplementary Figure 4

## A Gating strategy for tumor cells

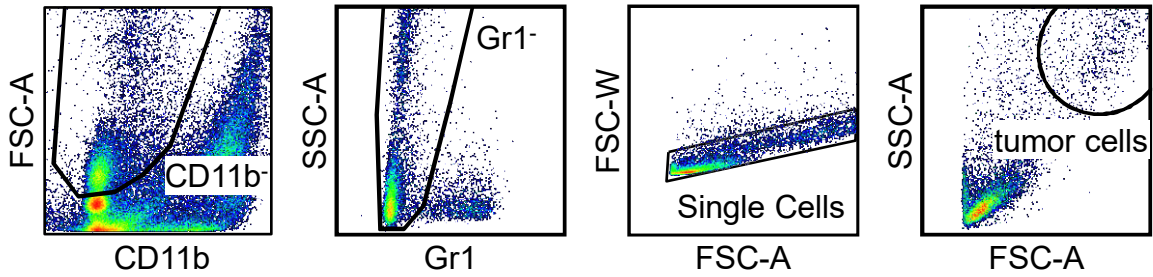

## B 2-NBDG uptake of tumor cells

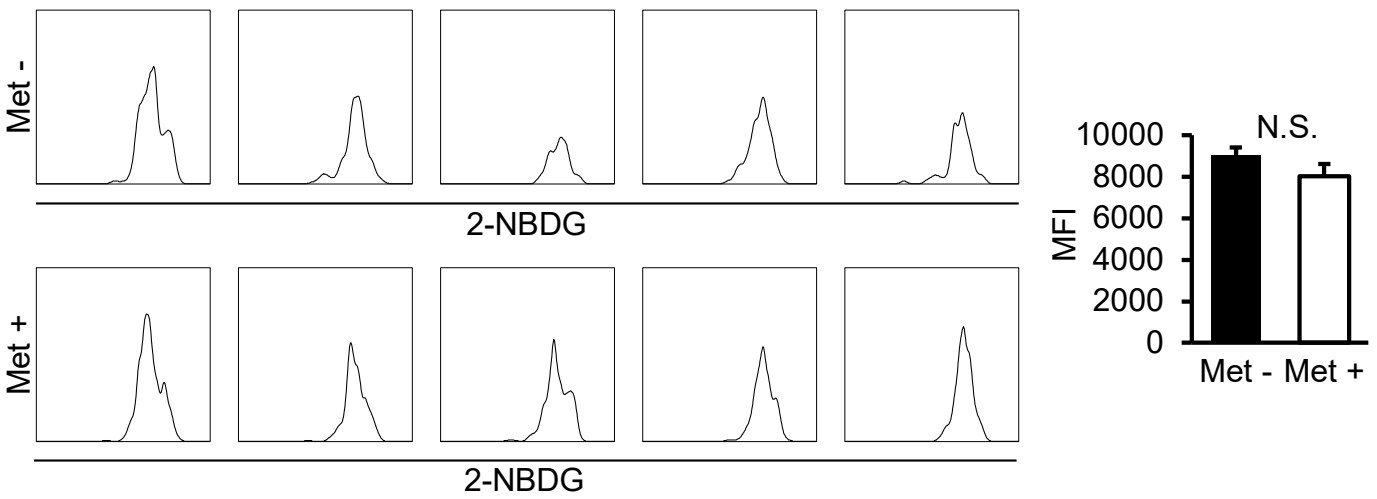

## C BODIPY uptake of tumor cells

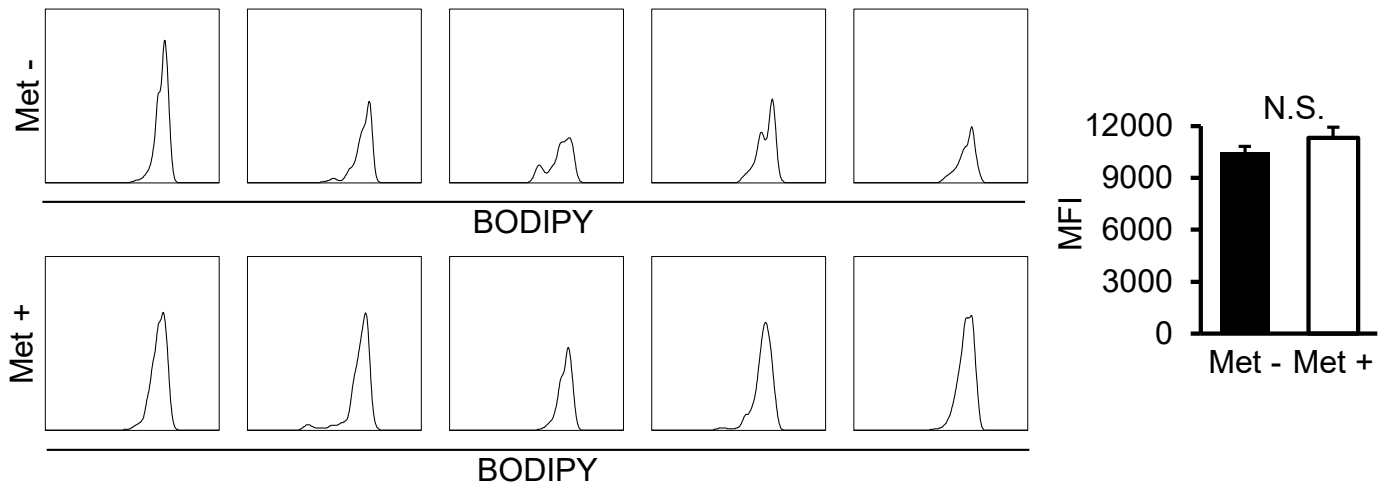

Supplement: dxy079_suppl_supplementary_figures.pdf [file dxy079_suppl_supplementary_figures.pdf]
